# Supplementary material
Source: PubMed Central journal article supplement (PMC1805597)
Supplement: pnas_0611377104_2.pdf [file pnas_0611377104_2.pdf]

West

East

% Eastern Ancestry

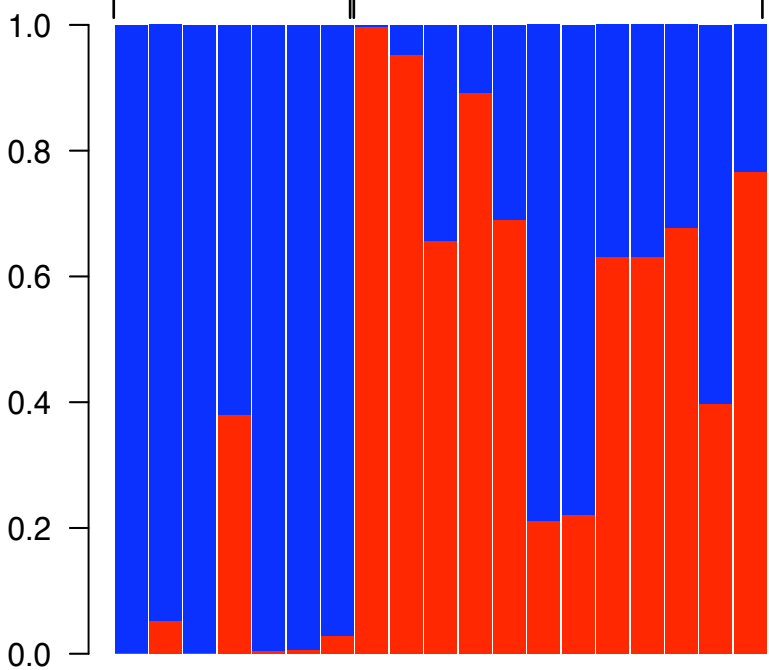

Peru  
Spain  
Turkey  
Turkey  
Israel  
Jordan  
Ethiopia  
Iraq  
Iran  
Uzbekistan  
Tajikistan  
Pakistan  
Kyrgystan  
India  
Nepal  
Nepal  
China  
China  
N.Korea
