# Supplementary material
Source: PubMed Central journal article supplement (PMC1805597)
Supplement: pnas_0611377104_4.pdf [file pnas_0611377104_4.pdf]

# Cbf3

Position 11111111111111111111  
 13334444455555555556667799900111222233444445  
 2677028148900122456699003791272315734671222771  
 5906436790635356502868458994603310633761127355

Site Number 111111111222222222233333333334444444  
 1234567890123456789012345678901234567890123456

| Consensus<br>Site Type                | TGGGTGAACACTCCTGGGGCCGGCGCGGTTGCCGGCGCATTGAAG<br>-----tvtvtttt--vttvttvvvvvttvttvt--tvt | wild |   | cultivated |   |   |   |
|---------------------------------------|-----------------------------------------------------------------------------------------|------|---|------------|---|---|---|
|                                       |                                                                                         | E    | W | E          | W | C | G |
| C.A...CT.....G.....A..C...CC...       |                                                                                         | -    | - | 1          | 2 | - | - |
| .A...A.....A...GTCAA.....GA.T.....G.. |                                                                                         | 1    | - | 1          | - | - | - |
| .A...A.....A...GTCAA.....A.T.....G..  |                                                                                         | -    | - | 1          | 1 | - | - |
| ...T...T.....ACT.....TT.....C.C.T.    |                                                                                         | -    | 1 | -          | - | - | - |
| ...T...T.....T.....C.C.T.             |                                                                                         | -    | 5 | -          | - | 1 | 1 |
| ...T...T.....T.....C.C...             |                                                                                         | -    | - | 1          | - | - | - |
| ...T...T.....C.C.T.                   |                                                                                         | -    | 1 | -          | - | - | - |
| ...T...G.....C.....C...               |                                                                                         | -    | 2 | -          | - | - | - |
| ...T.....T.....T.....C.T.             |                                                                                         | -    | - | -          | 1 | - | - |
| ...T.....T.....C.C.T.                 |                                                                                         | -    | 1 | -          | - | 1 | - |
| ?????????.T.....C.C.T.                |                                                                                         | -    | - | -          | - | 1 | - |
| ...C.....C...G.....A.....C...         |                                                                                         | 1    | 1 | -          | - | - | - |
| ...A...CGT..A--..T.C.....T.....       |                                                                                         | 3    | 1 | -          | - | 1 | - |
| ...T.....G.....AT.C.....T.....        |                                                                                         | 5    | 2 | 2          | - | 3 | 1 |
| ...G.....G.....C.AA...T...C.....A     |                                                                                         | -    | 3 | -          | - | - | - |
| ...CGT..A--..T.C.....T.....           |                                                                                         | 2    | 7 | -          | - | - | - |
| ...CGT..ACT.....C.....T.....          |                                                                                         | -    | 1 | -          | - | - | - |
| ...CGT..A--..T.C.....T.--..           |                                                                                         | -    | 1 | -          | - | - | - |
| ...T.....C.AA...T.....                |                                                                                         | -    | 1 | -          | - | - | - |
| ...T.....                             |                                                                                         | 13   | 2 | 4          | 2 | 2 | 1 |
| ...T.....                             |                                                                                         | 1    | - | -          | - | - | - |

# Dhn4

Position

1  
 1144555555566666666667777777799990  
 1901336788900123677990000028812291  
 4270063246958712847281234750570325

Site Number

1111111111222222222233333  
 1234567890123456789012345678901234

Consensus

ACTCCAGGTAAACGGGGGCAGCATGCTATCTCCT

Site Type

----vvvvttttvtttttvvvttttt--vtvv-  
 CTCG.....  
 CTCG.....G.....  
 C...A.....  
 C.....C.....  
 C.....T.....C.....C  
 C.....GCA..  
 C.....  
 C.....--.....  
 C.....CCCGGGTCAAAA.CCGGCATCGG.....  
 .TCG.CCCCGGGTCAAAA.CCGGCATCGG...G.  
 .....CCCGGGTCAAAA.CCGGCATCGG.....  
 ...A.....  
 .....A.....C.....  
 .....C.....G.  
 .....  
 ---.....-

**wild**

**cultivated**

| <b>E</b> | <b>W</b> | <b>E</b> | <b>W</b> | <b>C</b> | <b>G</b> |
|----------|----------|----------|----------|----------|----------|
| 1        | 1        | -        | -        | -        | -        |
| -        | 1        | -        | -        | -        | -        |
| 1        | -        | -        | -        | -        | -        |
| -        | 1        | -        | -        | -        | -        |
| -        | 3        | -        | -        | -        | -        |
| -        | -        | 4        | 1        | -        | -        |
| -        | -        | -        | 1        | -        | -        |
| -        | -        | 2        | 4        | 3        | 2        |
| -        | -        | 1        | -        | -        | -        |
| 1        | -        | -        | -        | -        | -        |
| 6        | 1        | -        | -        | -        | 1        |
| -        | 1        | -        | -        | -        | -        |
| -        | -        | 3        | 1        | 5        | -        |
| 3        | -        | -        | -        | -        | -        |
| 1        | 3        | 2        | 1        | 2        | -        |
| -        | 1        | -        | -        | -        | -        |

# Dhn9

Position 122333455  
12249605389537  
66828784566298

Site Number 11111  
12345678901234

| Consensus<br>Site Type | CTATCTAACCTGG<br>tvvttvtvtvttttt | wild |   | cultivated |   |   |   |
|------------------------|----------------------------------|------|---|------------|---|---|---|
|                        |                                  | E    | W | E          | W | C | G |
| G.....                 |                                  | 2    | - | -          | - | - | - |
| T..CT.....C..          |                                  | -    | - | 2          | - | - | - |
| T.....                 |                                  | -    | 2 | -          | - | - | - |
| .AT..C...TT...         |                                  | 10   | - | 3          | - | - | - |
| .AT...C.....           |                                  | -    | 3 | -          | - | - | - |
| .AT.....C..            |                                  | -    | 3 | -          | - | - | - |
| .AT.....               |                                  | -    | 4 | -          | - | - | - |
| .....G...C..           |                                  | -    | 2 | -          | - | - | - |
| .....G...AA            |                                  | -    | 2 | -          | - | - | - |
| .....C..               |                                  | 1    | 2 | 5          | 7 | 5 | 2 |
| .....                  |                                  | 8    | 6 | 1          | - | 5 | 1 |

# Faldh

Position 11  
 222222222333334444555566777788889900  
 334452233335590129967773454502563664526  
 091772967895644573550124174729593391924

Site Number 111111111122222222223333333333  
 123456789012345678901234567890123456789

| Consensus<br>Site Type     | TTGTGCGTCCCATCGCCATTCTTCACTGTCAATACTTGG<br>tvvttvvtvvtvwwwttttttttvtvvtvttvtvtttttt | wild |   | cultivated |   |   |   |
|----------------------------|-------------------------------------------------------------------------------------|------|---|------------|---|---|---|
|                            |                                                                                     | E    | W | E          | W | C | G |
| CG.C.....C.....            |                                                                                     | -    | 3 | -          | - | - | - |
| CG.C.....G..T..A.....      |                                                                                     | -    | - | -          | 3 | 1 | - |
| A....G.....T.C.....C.....  |                                                                                     | -    | - | -          | - | 1 | - |
| ....G.....T.C.....C.....   |                                                                                     | -    | 3 | -          | 2 | - | - |
| ....G.....T.C.....         |                                                                                     | -    | 1 | -          | - | - | - |
| ..T.....T...TCC.....       |                                                                                     | -    | - | -          | 2 | - | - |
| .....T...TCC.....          |                                                                                     | -    | - | 2          | 1 | 2 | 1 |
| ....A.....T.C.G.....       |                                                                                     | -    | 1 | -          | - | - | - |
| .....T.C.G.....            |                                                                                     | 5    | - | -          | - | - | - |
| .....TT.....               |                                                                                     | -    | - | -          | - | - | 1 |
| .....CCG.TTG.C.G....G..... |                                                                                     | -    | - | 1          | 1 | 1 | 1 |
| .....G..A..G.....G.....    |                                                                                     | 4    | - | -          | - | - | - |
| .....G..A..G.....          |                                                                                     | 1    | - | 1          | - | - | - |
| .....C.....G.CCAA          |                                                                                     | 2    | 2 | -          | - | - | - |
| .....C.....A..T.....       |                                                                                     | -    | 1 | -          | - | - | - |
| .....C.....C.....          |                                                                                     | -    | - | 8          | 1 | 2 | - |
| .....G.....                |                                                                                     | 1    | - | -          | - | - | - |
| .....G.....T.....          |                                                                                     | -    | 1 | -          | - | - | - |



# ORF1

Position 1111111  
 11355556666778888000244  
 967505680478680013233518  
 940125531568143512612105

Site Number 111111111122222  
 123456789012345678901234

| Consensus                | GCTCCTATAGACCGGTCTGTATA | wild | cultivated |  |  |  |
|--------------------------|-------------------------|------|------------|--|--|--|
| Site Type                | tttttttt----ttvtttvtvt  | E W  | E W C G    |  |  |  |
| ATC.....                 |                         | - 1  | - - - -    |  |  |  |
| ATC.....C....G..         |                         | - 1  | - - - -    |  |  |  |
| .T.....G..               |                         | - 1  | - - - -    |  |  |  |
| .T.....                  |                         | - 2  | - - - -    |  |  |  |
| ...T.....                |                         | 4 1  | - - - -    |  |  |  |
| ...T.....A.....          |                         | 1 1  | - 1 - 2    |  |  |  |
| ....TCG.GAG.TAT.C.C.A.GG |                         | 4 -  | - - - -    |  |  |  |
| ....TCG.----TAT.C.C.A.GG |                         | 2 -  | - - - -    |  |  |  |
| ....TCG.GAG.....         |                         | - -  | 1 - 1 -    |  |  |  |
| ....TCG.GAG.TAT.C.....G  |                         | - 7  | - - - -    |  |  |  |
| .....C.....TAT.CT.....G  |                         | 5 -  | 3 - - -    |  |  |  |
| .....TAT.C.A...G         |                         | - 1  | - 1 - -    |  |  |  |
| .....TAT.C.....G         |                         | 1 3  | - 5 5 1    |  |  |  |
| .....C....G..            |                         | 7 -  | 3 - - -    |  |  |  |
| .....G..                 |                         | - 1  | - - - -    |  |  |  |
| .....                    |                         | - 6  | 3 - 4 -    |  |  |  |

# Stk

Position

111111122223444446666777788889999990  
3688124777715676355681168789901344566791  
0913598267921628215500358055987799123729

Site Number

11111111112222222222333333333334  
1234567890123456789012345678901234567890

Consensus  
Site Type

|                                       | <b>wild</b> |          | <b>cultivated</b> |          |          |          |
|---------------------------------------|-------------|----------|-------------------|----------|----------|----------|
|                                       | <b>E</b>    | <b>W</b> | <b>E</b>          | <b>W</b> | <b>C</b> | <b>G</b> |
| T.....G..AC.....                      | 1           | -        | -                 | -        | -        | -        |
| T.....A.T.....A..                     | -           | 1        | -                 | -        | -        | -        |
| .TACA.C....C.....G....T.....GC.T....G | 1           | -        | -                 | 1        | -        | 2        |
| .TACA.C....C.....G....T.....GC.T.A..G | -           | -        | 1                 | -        | 1        | -        |
| ....A.....T.....T....G.GC.T....G      | -           | 3        | -                 | -        | -        | -        |
| ....A.....AC.....                     | 2           | -        | -                 | -        | -        | -        |
| ....A..A.....                         | -           | 1        | -                 | -        | -        | -        |
| ....CC....T.....T....C.....           | 1           | -        | -                 | -        | -        | -        |
| ....CC....T.....C.....                | 1           | 1        | 2                 | -        | -        | -        |
| ....C.....T....G.GC.T....G            | -           | 1        | -                 | -        | -        | -        |
| ....C.....TG.....A..                  | 1           | -        | -                 | -        | -        | -        |
| ....C.....T.....A..                   | 3           | 2        | 2                 | -        | -        | -        |
| ....A.....A.....T.                    | -           | 1        | -                 | -        | -        | -        |
| ....A.C...C.....C.....                | -           | -        | -                 | 1        | -        | -        |
| ....C.....C..A....                    | 4           | -        | 3                 | -        | -        | -        |
| ....C.....C.....                      | -           | 1        | -                 | -        | -        | -        |
| ....A.....T.                          | -           | 1        | -                 | -        | -        | -        |
| .....                                 | -           | -        | -                 | 6        | 4        | 1        |
