# Supplementary material
Source: PubMed Central journal article supplement (PMC1805597)

**A**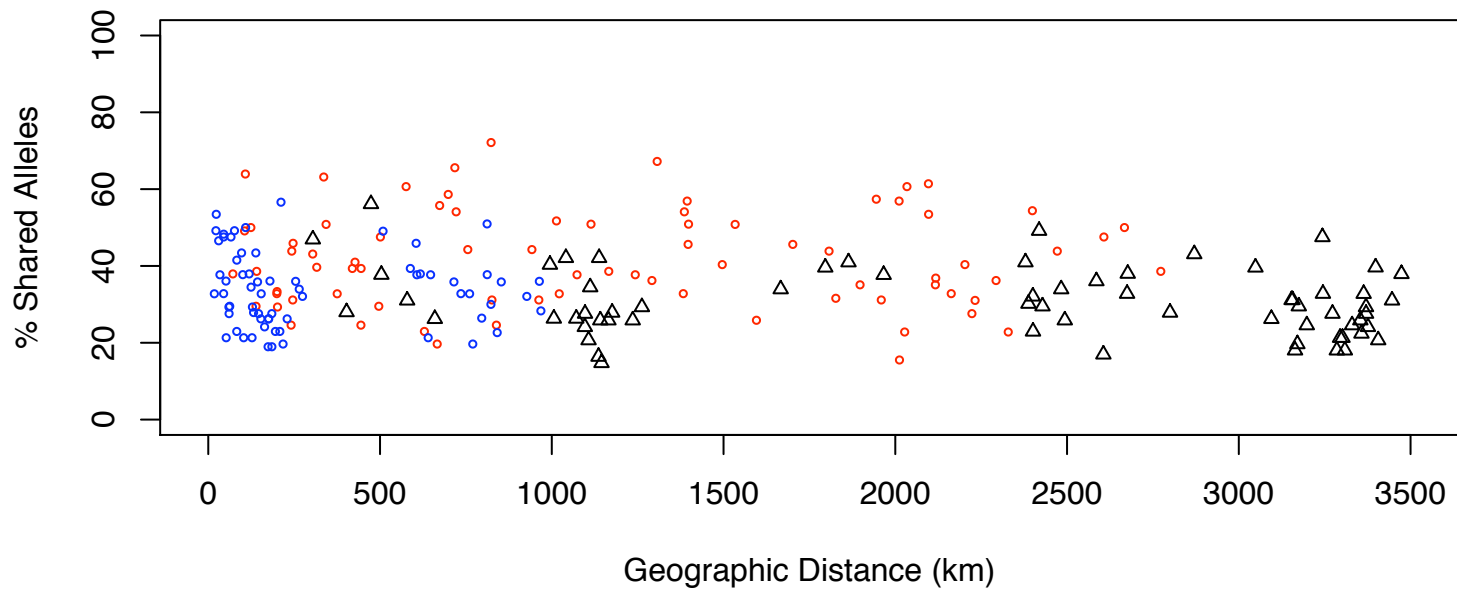**B**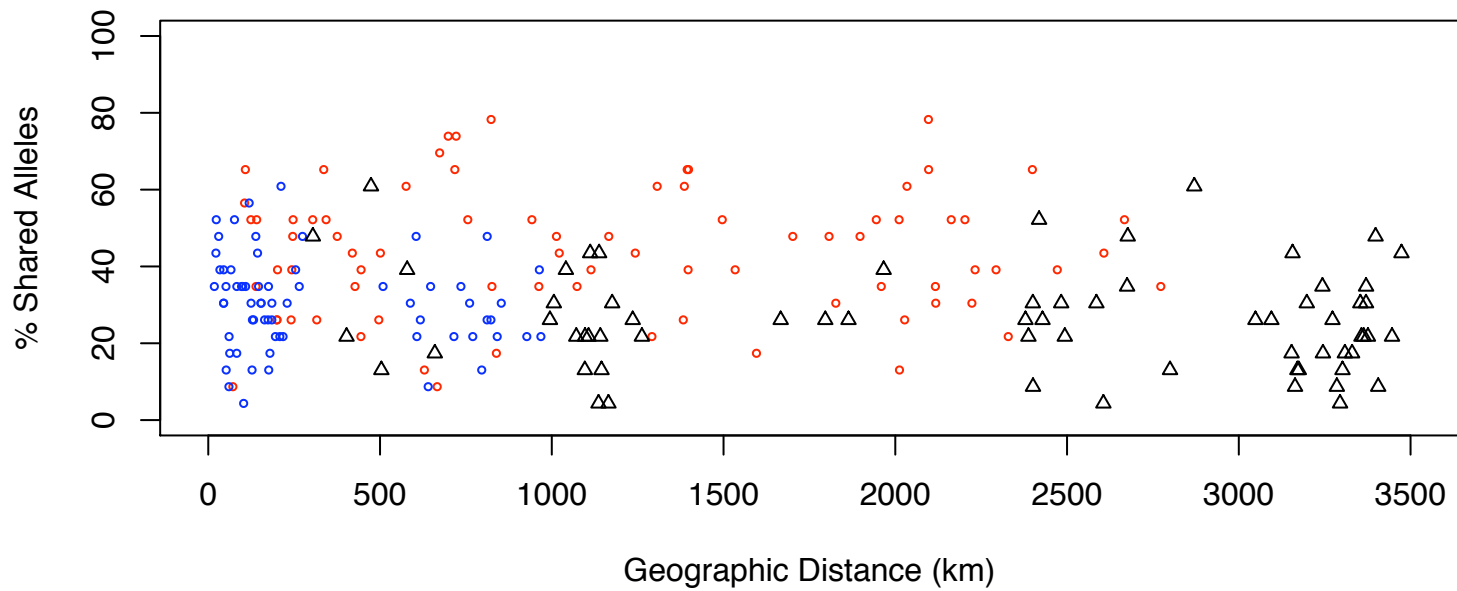

Supplement: pnas_0611377104_1.pdf [file pnas_0611377104_1.pdf]

% Shared Alleles

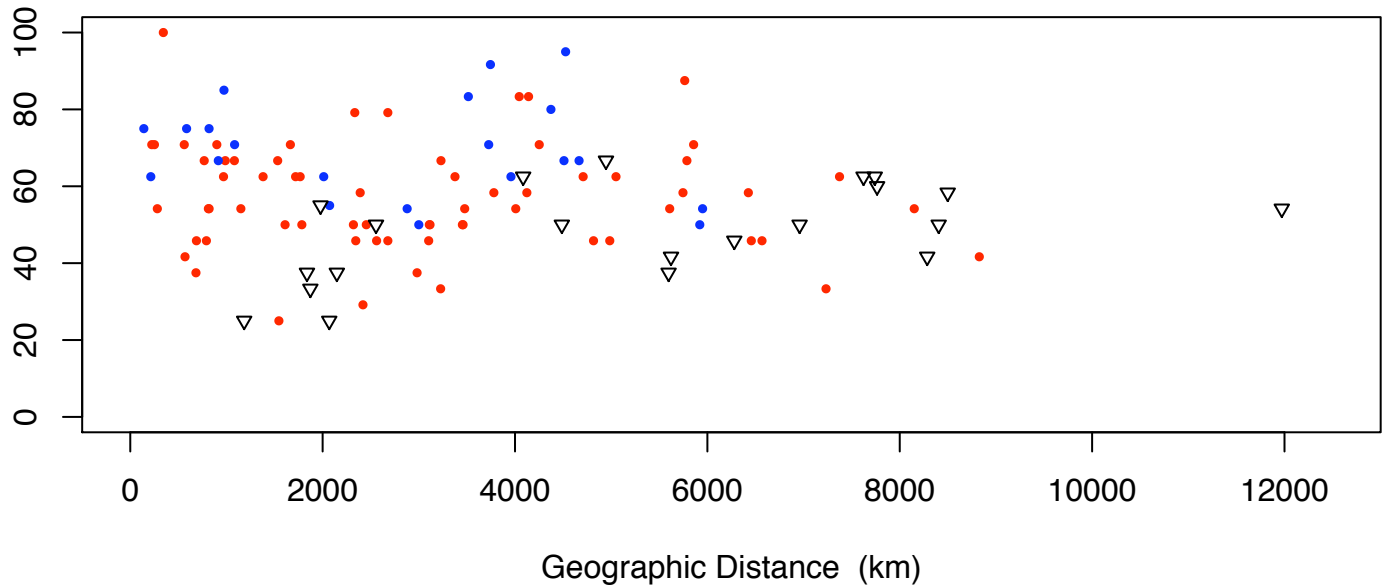

Supplement: pnas_0611377104_3.pdf [file pnas_0611377104_3.pdf]
